# Supplementary material
Source: PubMed Central journal article supplement (PMC6309378)
Supplement: NIHMS976575-supplement-701_2018_3595_MOESM1_ESM.pdf [file NIHMS976575-supplement-701_2018_3595_MOESM1_ESM.pdf]

*Acta Neurochirurgica*

**Development of a Statistical Model for Discrimination of Rupture Status in Posterior Communicating Artery Aneurysms – Supplementary Material**

Felicitas J. Detmer, Bong Jae Chung, Fernando Mut, Michael Pritz, Martin Slawski,  
Farid Hamzei-Sichani, David Kallmes, Christopher Putman, Carlos Jimenez, Juan R. Cebal

**Corresponding Author:**

Felicitas J. Detmer  
Bioengineering Department  
Volgenau School of Engineering  
George Mason University  
4400 University Drive  
Fairfax, VA 22030, USA  
Email: [fdetmer@gmu.edu](mailto:fdetmer@gmu.edu)

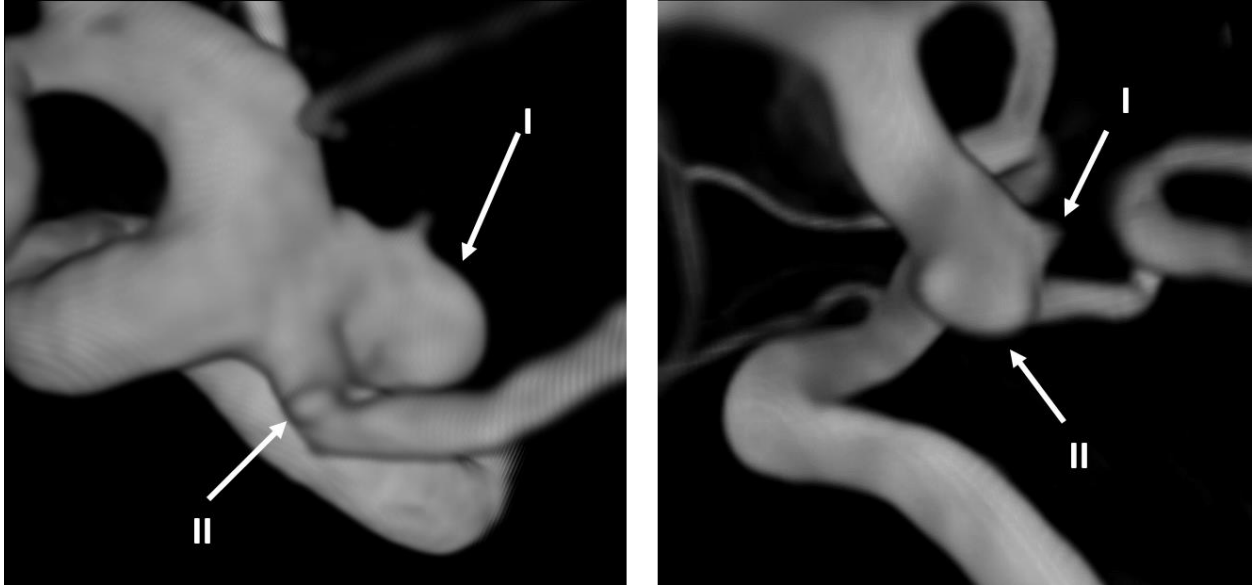

**Fig. 1** Angiographic images of the two cases with two ipsilateral PCOM aneurysms

**Tab. 1** Patient-related and categorical variables

| Variable               | Definition               |
|------------------------|--------------------------|
| Age [years]            | Patient age              |
| Female [0/1]           | Patient gender           |
| Male [0/1]             | Patient gender           |
| Angio-architecture [2] |                          |
| type_1 [0/1]           | True PCOM                |
| type_2 [0/1]           | At ICA-PICOM bifurcation |
| type_3 [0/1]           | PCOM from fundus         |
| type_4 [0/1]           | PCOM proximal/detached   |
| type_5 [0/1]           | PCOM proximal/attached   |
| type_6 [0/1]           | No PCOM visible in 3DRA  |
| type_7 [0/1]           | PCOM distal/distached    |

**Tab. 2** Morphological variables with the corresponding ranges in our data

| Variable                | Definition                                                   | Range        |
|-------------------------|--------------------------------------------------------------|--------------|
| Avol [cm <sup>3</sup> ] | Aneurysm volume                                              | [0, 6.46]    |
| Asize [cm]              | Max. distance between any two points on the aneurysm surface | [0.17, 2.66] |

|                          |                                                                                                                                                 |                |
|--------------------------|-------------------------------------------------------------------------------------------------------------------------------------------------|----------------|
| Aarea [cm <sup>2</sup> ] | Aneurysm area                                                                                                                                   | [0.03, 16.63]  |
| Nsize [cm]               | Max. distance between any two points on the neck surface                                                                                        | [0.15, 1.58]   |
| Narea [cm <sup>2</sup> ] | Area of the neck surface                                                                                                                        | [0.02, 2.86]   |
| Depth [cm]               | Max. distance of all points on aneurysm dome from aneurysm neck                                                                                 | [0.04, 2.25]   |
| AR                       | Aspect ratio = aneurysm depth/neck diameter                                                                                                     | [0.18, 4.17]   |
| Aheight [cm]             | Max. normal distance of all points on dome from aneurysm neck                                                                                   | [0.05, 2.12]   |
| Awidth [cm]              | Max. diameter of aneurysm slices parallel to aneurysm neck                                                                                      | [0.13, 2.35]   |
| HWR                      | Height to width ratio = aneurysm height/ aneurysm width                                                                                         | [0.28, 2.28]   |
| Ndiam [cm]               | Equivalent diameter of 2D neck = 4 x area/perimeter                                                                                             | [0.14, 0.9]    |
| Aspect                   | Aspect ratio 2 = aneurysm height/neck diameter                                                                                                  | [0.24, 4.43]   |
| BF                       | Bottle neck factor = aneurysm width/neck diameter [5]                                                                                           | [0.64, 3.73]   |
| BL                       | Bulge location = Distance of plane with largest diameter from neck / height [5]                                                                 | [0, 0.85]      |
| Vdiam [cm]               | Vessel diameter: Diameter of nearest vessel from aneurysm neck                                                                                  | [0.18, 0.68]   |
| SizeR                    | Size ratio = Aneurysm size/Vessel diameter                                                                                                      | [0.4, 8.54]    |
| VOR                      | Volume to ostium ratio = Aneurysm volume/Area 2D of neck                                                                                        | [0.01, 10.02]  |
| CR                       | Convexity ratio = Aneurysm volume/Volume of convex hull [3]                                                                                     | [0.43, 0.98]   |
| IPR                      | Isoperimetric ratio = Aneurysm area/(Aneurysm volume <sup>2/3</sup> ) [3]                                                                       | [4.27, 6.41]   |
| EI                       | Ellipticity index = $1-(18\pi)^{1/3} (V^{2/3}/S)$ , with V and S referring to the volume and area of the aneurysm convex hull, respectively [5] | [0.22, 0.45]   |
| NSI                      | Non-sphericity index = $1-(18\pi)^{1/3} (V^{2/3}/S)$ , with V and S referring to the aneurysm volume and area, respectively [5]                 | [0.1, 0.4]     |
| GAA [cm <sup>-2</sup> ]  | Area weighted average of Gaussian curvature [3]                                                                                                 | [-2.68, 96.72] |
| MAA [cm <sup>-1</sup> ]  | Area weighted average of mean curvature [3]                                                                                                     | [1.2, 10.92]   |
| GLN                      | L2-Norm of Gaussian curvature [3]                                                                                                               | [0.23, 12.7]   |
| MLN                      | L2-Norm of mean curvature [3]                                                                                                                   | [0.13, 0.68]   |

**Tab. 3** Hemodynamic variables with corresponding ranges in our data.

| Variable | Definition                     | Range     |
|----------|--------------------------------|-----------|
| ICI      | Inflow concentration index [4] | [0, 6.64] |

|                                 |                                                                                                                         |                  |
|---------------------------------|-------------------------------------------------------------------------------------------------------------------------|------------------|
| Q [cm <sup>3</sup> /s]          | Mean inflow rate into aneurysm [4]                                                                                      | [0, 6.21]        |
| KE [erg]                        | Mean kinetic energy [4]                                                                                                 | [0, 2398.94]     |
| SR [1/s]                        | Mean shear rate [4]                                                                                                     | [0.23, 1056.98]  |
| VE [cm/s]                       | Mean velocity [4]                                                                                                       | [0.01, 40.14]    |
| VO [1/s]                        | Mean vorticity [4]                                                                                                      | [0.19, 1301.85]  |
| VD [erg/s]                      | Mean viscous dissipation [4]                                                                                            | [0.03, 15187.2]  |
| WSSmax [dyne/cm <sup>2</sup> ]  | Maximum wall shear stress [4]                                                                                           | [13.56, 2779.56] |
| WSSmin [dyne/cm <sup>2</sup> ]  | Minimum wall shear stress [4]                                                                                           | [0, 12.11]       |
| WSSmean [dyne/cm <sup>2</sup> ] | Mean wall shear stress [4]                                                                                              | [0.02, 130.74]   |
| LSA (%)                         | Low shear area [4]                                                                                                      | [0, 100]         |
| SCI                             | Shear concentration index [4]                                                                                           | [0, 80.93]       |
| OSImax                          | Maximum oscillatory shear index [4]                                                                                     | [0, 0.48]        |
| OSImean                         | Mean oscillatory shear index [4]                                                                                        | [0, 0.13]        |
| WSSves [dyne/cm <sup>2</sup> ]  | Mean wall shear stress in parent vessel (within vessel region with distance to the aneurysm neck of less than 1 cm) [4] | [9.84, 148.04]   |
| WSSnorm                         | Normalized WSS = WSSmean/WSSves                                                                                         | [0, 1.88]        |
| MWSSnorm                        | Maximum normalized WSS = WSSmax/WSSves                                                                                  | [0.6, 32.32]     |
| Corelen [cm]                    | Vortex core line length (flow complexity) [1]                                                                           | [0, 16.72]       |
| podent                          | Proper orthogonal decomposition (POD) entropy (flow stability) [1]                                                      | [0.02, 0.99]     |
| podenum                         | Proper orthogonal decomposition – number of modes to account for 95% of total energy (flow stability) [1]               | [1, 6]           |
| Vmax [cm/s]                     | Peak velocity                                                                                                           | [3.4, 440.8]     |
| VmaxMean [cm/s]                 | Time average of maximum velocity in space                                                                               | [0.87, 241.09]   |

**Tab. 4** Coefficients of variables retained in the different statistical models (variables that were not retained in any model have been omitted)

| <b>Variable</b>  | <b>Model 1</b> | <b>Model 2</b> | <b>Model 2a</b> | <b>Model 2b</b> | <b>Model 2c</b> |
|------------------|----------------|----------------|-----------------|-----------------|-----------------|
| <b>Intercept</b> | -4.4558        | -3.4617        | -2.8326         | -2.6788         | -3.6006         |
| <b>WSSmax</b>    | 0.0001         | 0              | 0               | 0               | 0.0005          |
| <b>WSSmin</b>    | -0.2267        | -0.1697        | -0.0043         | -0.1968         | 0               |
| <b>WSSves</b>    | 0.0146         | 0.0056         | 0.0028          | 0.0027          | 0               |
| <b>SCI</b>       | -0.0281        | -0.001         | 0               | -0.0042         | 0.0012          |
| <b>OSImax</b>    | 4.2304         | 1.6469         | 2.1332          | 0.7726          | 0.5498          |
| <b>OSImean</b>   | -15.4188       | 0              | 0               | 0               | 0               |
| <b>podent</b>    | 0              | -0.2332        | 0               | 0               | 0               |
| <b>Vmax</b>      | 0.0028         | 0.007          | 0.0033          | 0               | 0.0075          |
| <b>VmaxMean</b>  | 0              | 0              | 0               | 0.0127          | 0               |
| <b>Nsize</b>     | 0              | -0.3493        | 0               | 0               | -1.1805         |
| <b>Aheight</b>   | -1.277         | 0              | 0               | 0               | 0               |
| <b>Awidth</b>    | -0.0637        | -0.1587        | 0               | 0               | -0.2443         |
| <b>HWR</b>       | 0              | 0              | 0               | 0               | 0.7671          |
| <b>BL</b>        | 1.4595         | 0.6137         | 0.522           | 0.3388          | 0               |
| <b>Vdiam</b>     | 0              | 0              | 0               | -1.8971         | 2.1722          |
| <b>VOR</b>       | 0              | -0.1327        | 0               | -0.0509         | -0.0419         |
| <b>NSI</b>       | 9.5943         | 7.8988         | 6.6416          | 10.2484         | 3.3943          |
| <b>MLN</b>       | 2.486          | 1.3671         | 0.0496          | 0               | 2.2573          |
| <b>type_1</b>    | 1.1094         | 0.2841         | 0               | 0.1369          | -0.8003         |
| <b>type_2</b>    | 0.2595         | 0.0702         | 0               | -0.0094         | 0.2338          |
| <b>type_3</b>    | 0.3528         | 0.143          | 0               | 0.0188          | 0.6406          |
| <b>type_4</b>    | -0.3777        | 0.0393         | 0               | 0.0994          | -0.0078         |
| <b>type_5</b>    | 0.1099         | 0.0677         | 0               | 0.024           | 0.231           |
| <b>type_6</b>    | -0.481         | -0.2091        | 0               | -0.09           | -0.2973         |
| <b>type_7</b>    | -0.9729        | -0.3952        | 0               | -0.1798         |                 |
| <b>age</b>       | -0.004         | N/A            | N/A             | N/A             | N/A             |

**Fig. 2** ROC Curves (left) and calibration plots (right) for models 2, 2a, 2b, and 2c evaluated with the corresponding left-out data

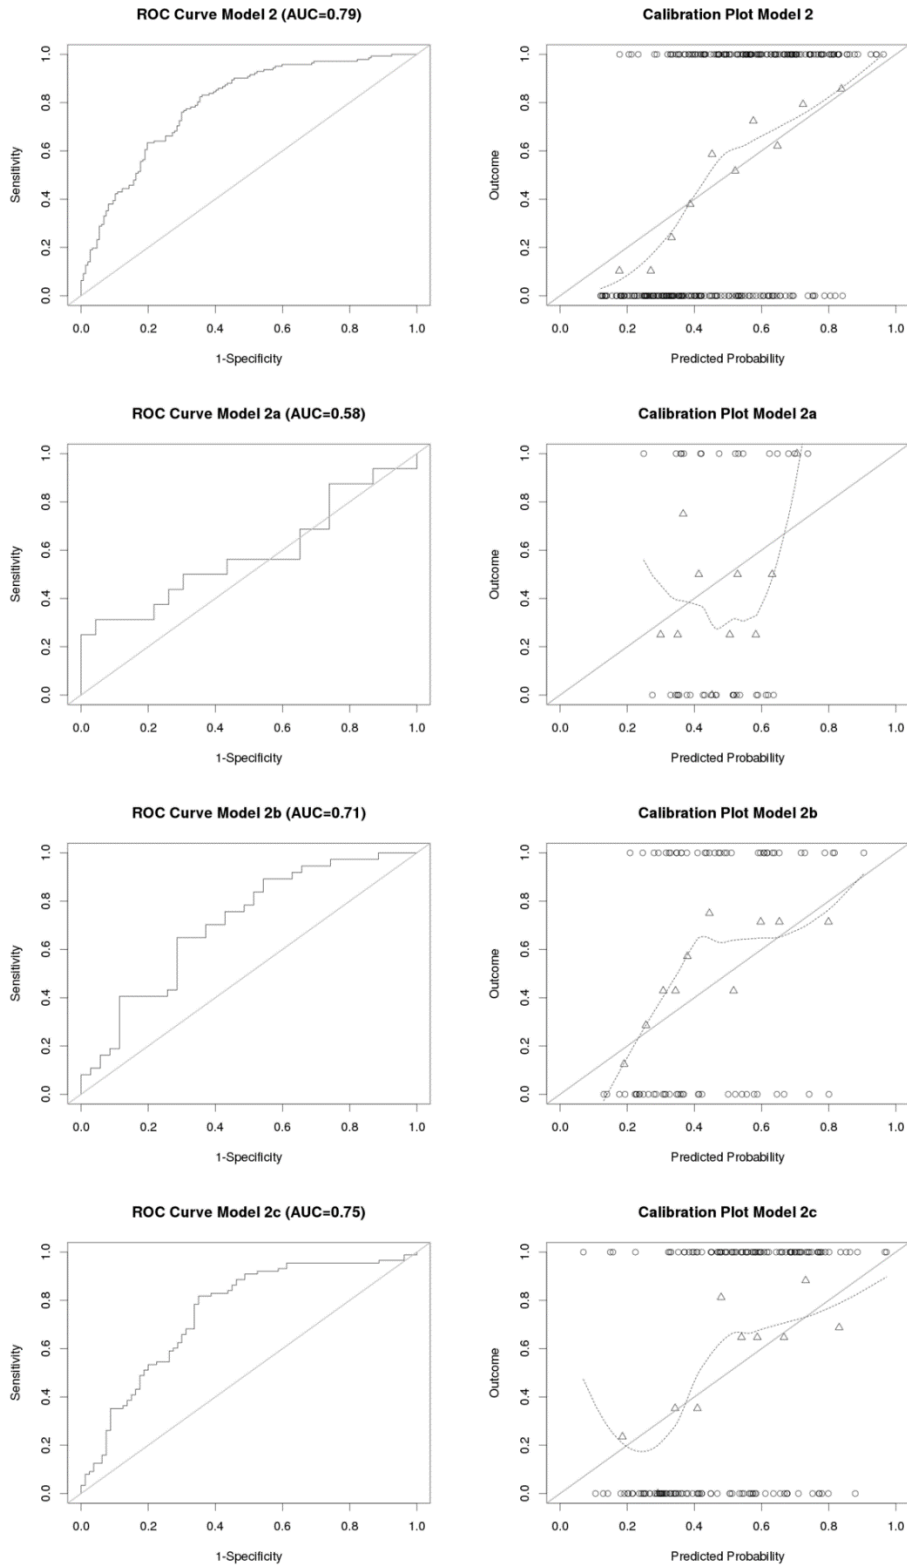

## References

1. Byrne G, Mut F, Cebal JR (2014) Quantifying the large-scale hemodynamics of intracranial aneurysms. *AJNR Am J Neuroradiol* 35:333–338
2. Chung BJ, Doddasomayajula R, Mut F, Detmer F, Pritz MB, Hamzei-Sichani F, Brinjikji W, Kallmes DF, Jimenez CM, Putman CM, Cebal JR (2017) Angioarchitectures and Hemodynamic Characteristics of Posterior Communicating Artery Aneurysms and Their Association with Rupture Status. *Am J Neuroradiol* 38(11):2111–2118
3. Ma B, Harbaugh RE, Raghavan ML (2004) Three-dimensional geometrical characterization of cerebral aneurysms. *Ann Biomed Eng* 32:264–273
4. Mut F, Löhner R, Chien A, Tateshima S, Viñuela F, Putman CM, Cebal JR (2011) Computational hemodynamics framework for the analysis of cerebral aneurysms. *Int J Num Meth Biomed Eng* 27:822–839
5. Raghavan ML, Ma B, Harbaugh RE (2005) Quantified aneurysm shape and rupture risk. *J Neurosurg* 102:355–62
